# Supplementary material
Source: bioRxiv or medRxiv preprint supplement (https://medrxiv.org/highwire/filestream/69583/field_highwire_adjunct_files/3/19009183-4.pdf)
Supplement: Supplementary file [file 19009183-4.pdf]

# Baseline Survey

Please complete the survey below.

Thank you!

---

---

**[baseline\_arm\_1][first\_name] before we begin, it is important that we understand a little bit about you.**

**Please answer the following questions.**

How many weeks pregnant are you?

\_\_\_\_\_ (Please enter whole number between 12 and 42)

Which country were you born in?

- Australia
- China
- Fiji
- New Zealand
- UK
- USA
- Other

If other, in which country were you born?

\_\_\_\_\_

If you were not born in Australia, how many years have you lived in Australia?

\_\_\_\_\_ (Please enter whole number ie: 5)

Do you speak a language other than English at home?

- Yes
- No

What is the main language you speak at home?

\_\_\_\_\_

How well do you speak English?

- Not at all
- Not well
- Well
- Very well

How confident are you reading and understanding English?

- Not at all confident
- Slightly confident
- Moderately confident
- Very confident
- Extremely confident

What is your highest level of education?

- Year 9 or equivalent
- Year 10 or equivalent
- Year 11 or equivalent
- Year 12 or equivalent
- Finished TAFE/course/apprenticeship
- Finished Bachelor or Higher Degree

Please specify your field of study

- 1. Arts and Humanities
- 2. Business or Management
- 3. Science - non-medical
- 4. Science - medical
- 5. Other

---

---

**It is important we know whether you have any previous work experience in health**

Do you have any background experience in healthcare?

- Yes
- No

Please specify your area of experience

- 1. Health administration
- 2. Nurse
- 3. Doctor
- 4. Allied Health Professional
- 5. Eye health care professional

---

---

**It is important we understand whether you have had any previous experience the main carer of children**

Have you been the main carer for a child under the age of 5 years?

- Yes
- No

Number of own children

\_\_\_\_\_ (Whole number ie: 3)

Number of step-children

\_\_\_\_\_ (Whole number ie. 2)

Number of children as a nanny/relative

\_\_\_\_\_ (Whole Number ie. 4)

Total Number of Children

\_\_\_\_\_

Please enter child 1 date of birth

\_\_\_\_\_

Child 1 Age

\_\_\_\_\_

Please enter child 2 date of birth

\_\_\_\_\_

Child 2 Age

\_\_\_\_\_

Please enter child 3 date of birth

\_\_\_\_\_

Child 3 Age

\_\_\_\_\_

Please enter child 4 date of birth

\_\_\_\_\_

Child 4 Age

\_\_\_\_\_

Please enter child 5 date of birth

\_\_\_\_\_

Child 5 Age

\_\_\_\_\_

Please enter child 6 date of birth

\_\_\_\_\_

Child 6 Age

\_\_\_\_\_

Please enter child 7 date of birth

\_\_\_\_\_

Child 7 Age

\_\_\_\_\_

---

---

**It is important we understand what previous experience you have with health problems**

Have you or anyone in your family seen a doctor or received treatment for any of the following?

- Diarrhoea
  - Fever
  - Rash
  - Crossed eye/turned eye
  - Hearing loss
- ((Check any or all that apply))

---

---

**It is important we understand how confident you are with reading and understanding health information****Please indicate how difficult or easy the following tasks are for you now.****Remember to check only one box for each statement**

Confidently fill medical forms in the correct way

- Cannot do or always difficult
- Usually difficult
- Sometimes difficult
- Usually easy
- Always easy

Accurately follow instructions from healthcare providers

- Cannot do or always difficult
- Usually difficult
- Sometimes difficult
- Usually easy
- Always easy

Read and understand written health information

- Cannot do or always difficult
- Usually difficult
- Sometimes difficult
- Usually easy
- Always easy

Read and understand all the information on medical labels

- Cannot do or always difficult
- Usually difficult
- Sometimes difficult
- Usually easy
- Always easy

Understand what healthcare providers are asking you to do

- Cannot do or always difficult
- Usually difficult
- Sometimes difficult
- Usually easy
- Always easy

---

---

**What would you do?**

**As a parent, there will be many times when you might be concerned about health problems in yourself or your child. This study will explore your response to 6 situations you may experience as a parent. Please answer the following questions for each scenario.**

**Scenario 1 - You delivered your baby 3 weeks ago. You are in the shower and you notice your breast is red**

Your breast is red and feels hot and painful to touch, you feel like you might have a fever

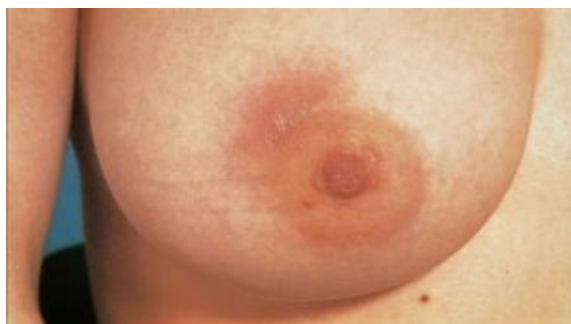

How concerned are you?

- Not at all concerned
- Somewhat concerned
- Concerned
- Very concerned

How quickly would you seek medical advice?

- Today/tomorrow
- Within a week
- Within 1 month
- Longer than 1 month
- Not at all

Where would you go/look for information?

- Social media
  - Maternal & Child Health Nurse
  - Internet
  - GP/local doctor
  - Nurse-on-call telephone help-line
  - Other
- (Tick all or any that apply)

Please specify where else you would seek advice or information

\_\_\_\_\_

---

---

**Scenario 2 - Your baby is 18 months old.**

You notice a white pupil in ONE of your photographs. You can't see anything just looking at her. Baby is otherwise well and healthy and does not show any signs of not being able to see.

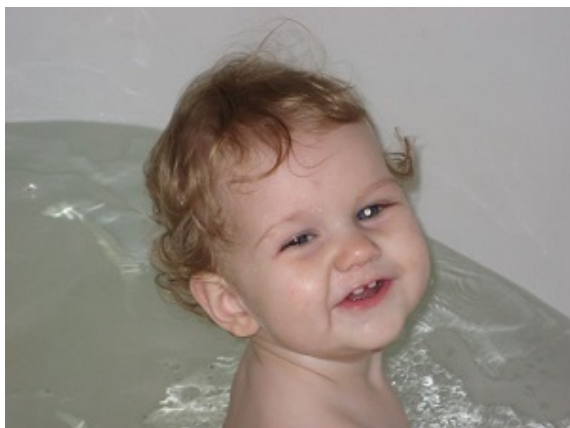

How concerned are you?

- Not at all concerned
- Somewhat concerned
- Concerned
- Very concerned

How quickly would you seek medical advice?

- Today/tomorrow
- Within a week
- Within 1 month
- Longer than 1 month
- Not at all

Where would you go/look for information?

- GP/local doctor
  - Internet
  - Nurse-on-call telephone help-line
  - Social media
  - Other
  - Maternal & Child Health Nurse
- (Tick all or any that apply)

Please specify where else you would seek advice or information

---

---

---

**Scenario 3 - Your baby is 2 years old.**

You notice your baby has been unsettled over the last 24 hours. She is not feeding well, her frequent dirty nappies look unusual, as if she has diarrhoea

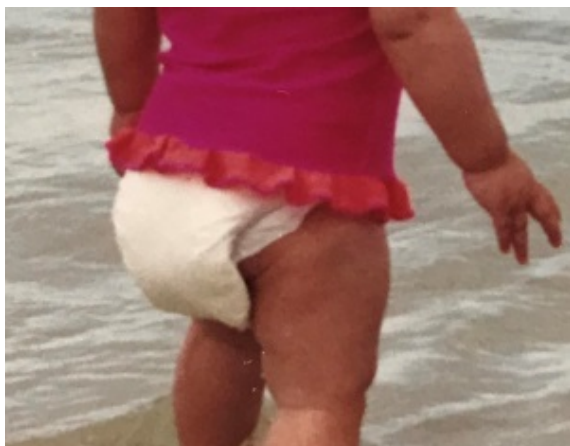

How concerned are you?

- Not at all concerned
- Somewhat concerned
- Concerned
- Very concerned

How quickly would you seek medical advice?

- Today/tomorrow
- Within a week
- Within 1 month
- Longer than 1 month
- Not at all

Where would you go/look for information?

- Social media
  - Maternal & Child Health Nurse
  - Internet
  - GP/local doctor
  - Nurse-on-call telephone help-line
  - Other
- (Tick all or any that apply)

Please specify where else you would seek advice or information

---



---

**Scenario 4 - Your 6-month old baby's eye has been watering on and off for weeks.**

---

You notice this discharge in the eye on waking and throughout the day.  
The eye is not red and your baby is otherwise well.  
She is feeding and sleeping well.

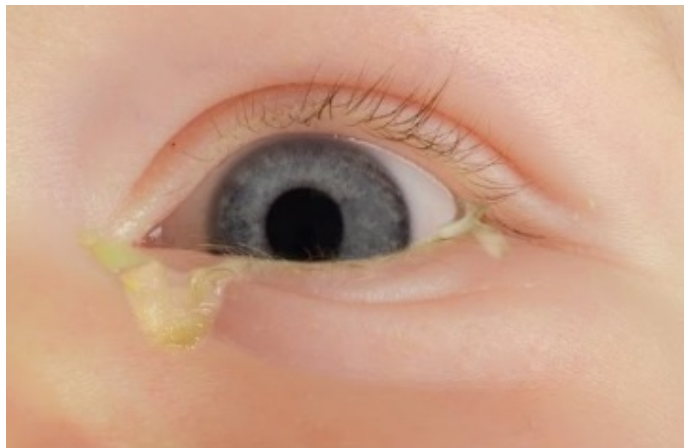

How concerned are you?

- Not at all concerned
- Somewhat concerned
- Concerned
- Very concerned

How quickly would you seek medical advice?

- Today/tomorrow
- Within a week
- Within 1 month
- Longer than 1 month
- Not at all

Where would you go/look for information?

- Social media
  - Maternal & Child Health Nurse
  - Internet
  - GP/local doctor
  - Nurse-on-call telephone help-line
  - Other
- (Tick all or any that apply)

Please specify where else you would seek advice or information

---

---

---

**Scenario 5**

**Your 10-month old baby has developed a rash on her leg during the day.**

Her body is hot to touch, it feels like she has a fever.  
She is refusing to eat or drink and is unsettled.

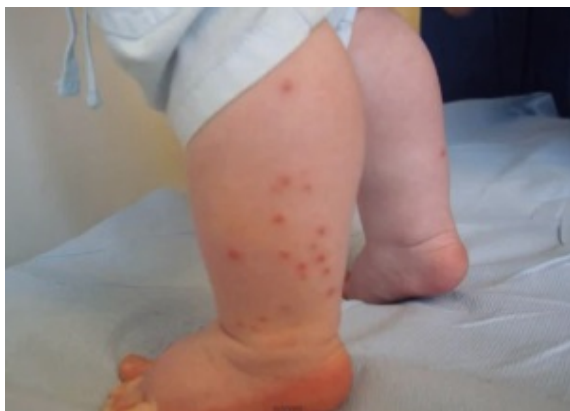

How concerned are you?

- Not at all concerned
- Somewhat concerned
- Concerned
- Very concerned

How quickly would you seek medical advice?

- Today/tomorrow
- Within a week
- Within 1 month
- Longer than 1 month
- Not at all

Where would you go/look for information?

- Social media
  - Maternal & Child Health Nurse
  - Internet
  - GP/local doctor
  - Nurse-on-call telephone help-line
  - Other
- (Tick all or any that apply)

Please specify where else you would seek advice or information

---

---

**Scenario 6****Your baby is 12 months' old.**

Some of the time you notice her eye is turning in towards her nose.  
She is not bumping into things or showing any signs of not being able to see.

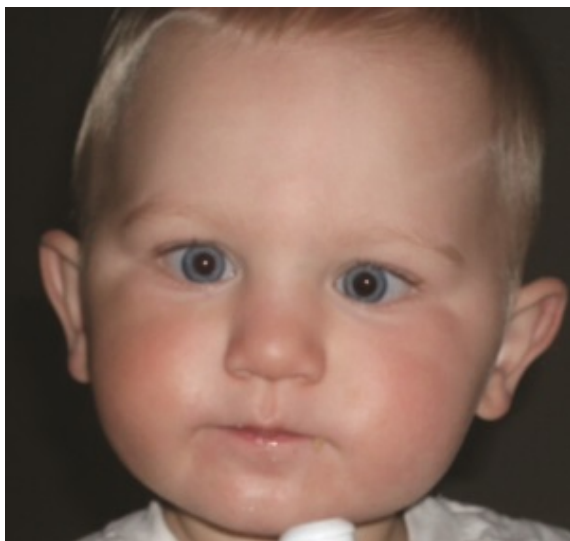

How concerned are you?

- Not at all concerned
- Somewhat concerned
- Concerned
- Very concerned

How quickly would you seek medical advice?

- Today/tomorrow
- Within a week
- Within 1 month
- Longer than 1 month
- Not at all

Where would you go/look for information?

- Social media
  - Maternal & Child Health Nurse
  - Internet
  - GP/local doctor
  - Nurse-on-call telephone help-line
  - Other
- (Tick all or any that apply)

Please specify where else you would seek advice or information

---

---

---

**Please read the following statements carefully.****To what extent do you agree or disagree with each of the following statements?**

I expect to receive important information about my baby's health and development when he/she is born.

- Strongly agree
- Agree
- Disagree
- Strongly disagree

I understand how my baby's vision will develop in the first few months of life.

- Strongly agree
- Agree
- Disagree
- Strongly disagree

I would be concerned if I saw a white pupil in a photograph of my baby

- Strongly agree
- Agree
- Disagree
- Strongly disagree

I would be concerned if I noticed my 2-year old baby's eye turning (cross-eyed) some of the time

- Strongly agree
- Agree
- Disagree
- Strongly disagree

I would feel judged taking my child for an eye check just because I was worried

- Strongly agree
- Agree
- Disagree
- Strongly disagree

---

---

**Please read the following statements carefully.**

**Rate your confidence for each of the following statements**

I can recognise signs of eye problems in my baby

- Not at all confident
- Slightly confident
- Moderately confident
- Very confident
- Extremely confident

I know what to do if I am concerned about my baby's vision

- Not at all confident
- Slightly confident
- Moderately confident
- Very confident
- Extremely confident

I know where to find more information about eye problems in infants and children

- Not at all confident
- Slightly confident
- Moderately confident
- Very confident
- Extremely confident

I would feel confident talking to a doctor or nurse about my baby's vision

- Not at all confident
- Slightly confident
- Moderately confident
- Very confident
- Extremely confident

I would feel confident talking to a doctor or nurse about my baby's feeding

- Not at all confident
- Slightly confident
- Moderately confident
- Very confident
- Extremely confident

---

---

**Please read the following statements carefully.****Indicate whether you feel these statements are true, false or if you are unsure**

Babies can follow moving objects with their eyes from 2 months of age

- True  
 False  
 Unsure  
 I don't know

A rapidly developing rash with a high fever in my baby is cause for concern

- True  
 False  
 Unsure  
 I don't know

A baby's vision develops from birth until 7 years of age

- True  
 False  
 Unsure  
 I don't know

It is normal for a baby to have an eye turn at 1 year of age

- True  
 False  
 Unsure  
 I don't know

An eye turn can cause problems with a baby or child's vision development

- True  
 False  
 Unsure  
 I don't know

An eye turn will disappear by itself by the age of 3 years

- True  
 False  
 Unsure  
 I don't know

Only eye turns that are obvious all the time are worth worrying about

- True  
 False  
 Unsure  
 I don't know

A family history of crossed/turned eye turn is not important

- True  
 False  
 Unsure  
 I don't know

Thank you [baseline\_arm\_1][first\_name] for completing the first survey.  
In 2 weeks' time you will be sent a second survey to complete via your nominated email address.  
The link will only be available to you.
